# Supplementary material for: Floristic Composition and Structural Analysis of Woody Plant Species in Jib Godo Natural Forest, Farta District, South Gonder Zone, Amhara Region, Ethiopia
Source: Hindawi journal article supplement (doi:10.1155/2023/6429001), 2023-02-14
Supplement: f1 [file 6429001.f1.docx]

Appendices

Appendix 1: List of plant species collected in Jibgodo natural forest

T= Trees, S= Shrubs, L=lianas

| **No** | **Scientific name** | **Family** | **Vernacular name** | **Habit** | **To Ethiopia** |
| --- | --- | --- | --- | --- | --- |
| 1 | *Acacia polyacantha* Willd. | Fabaceae | Neche grar | T | Indigenous |
| 2 | *Acanthus sennii* Chiov. | Acanthaceae | Koshelie | S | Endemic |
| 3 | *Albizia gummifera* (J. F. Gmel.) C. A. Sm. | Fabaceae | Kachena /Sessa | T | Indigenous |
| 4 | *Apodytes dimidiata* E. Mey. ex Arn. | Icacinaceae | Donga | T | Indigenous |
| 5 | *Bersama abyssinica* Fresen. | Melianthaceae | Azamr | T | Indigenous |
| 6 | *Bridelia micrantha* (Hochst.) Baill. | Euphorbiaceae | Yenbr tifr | T | Indigenous |
| 7 | *Brucea antidysenterica* J. F. Mill. | Simaroubaceae | Abalo | S | Indigenous |
| 8 | *Buddleja polystachya* Fresen. | Loganiaceae | Anfar | S | Indigenous |
| 9 | *Calpurnia aurea* (Ait.) Benth. | Fabaceae | Zgta | S | Indigenous |
| 10 | *Carissa spinarum* L. | Apocynaceae | Agam | S | Indigenous |
| 11 | *Cassipourea malosana* (Baker) Alston. | Rhizophoraceae | Tkur enchet | S | Indigenous |
| 12 | *Clausena anisata* (Willd.) Benth. | Rutaceae | Lmbch | T | Indigenous |
| 13 | *Clematis hirsuta* Perr. & Guill | Ranunculaceae | Azo hareg | L | Indigenous |
| 14 | *Clutia abyssinica* Jaub. & Spach. | Euphorbiaceae | Fyel fej | S | Indigenous |
| 15 | *Croton macrostachyus* Del. | Euphorbiaceae | Bsana | T | Indigenous |
| 16 | *Discopodium penninervium* Hochst. | Solanaceae | Almit | S | Indigenous |
| 17 | *Dodonaea angustifolia* L.f. | Sapindaceae | Ktkta | S | Indigenous |
| 18 | *Dombeya torrida* (J. F. Gmel.) P. Bamps | Sterculiaceae | Wulkifa | T | Indigenous |
| 19 | *Dovyalis abyssinica* (A. Rich). Warb. | Flacourtiaceae | Koshm | T | Indigenous |
| 20 | *Dregea abyssinica* (Hochst.) K. Schum. | Asclepiadaceae | Tkur mayder | L | Indigenous |
| 21 | *Ekebergia capensis* Sparrm. | Meliaceae | Lol | T | Indigenous |
| 22 | *Embelia schimperi* Vatke | Myrsinaceae | Enkoko | T | Indigenous |
| 23 | *Erica arborea* L. | Ericaceae | Asta | T | Indigenous |
| 24 | *Erythrina brucei* Schweinf. | Fabaceae | Korch | T | Endemic |
| 25 | *Eucalyptus globulus* Labill. | Myrtaceae | Neche baharzaf | T | Exotic |
| 26 | *Euphorbia abyssinica* Gmel. | Euphorbiaceae | Kulkoal | T | Indigenous |
| 27 | *Ficus sur* Forssk | Moraceae | Yemibela shola | T | Indigenous |
| 28 | *Galiniera saxifraga* (Hochst.) Bridson. | Rubiaceae | Yewef shola | T | Indigenous |
| 29 | *Hibiscus macranthus* Hochst. ex A. Rich. | Malvaceae | Nacha | S | Indigenous |
| 30 | *Hypericum revolutum* Vahl | Hypericaceae | Amja | S | Indigenous |
| 31 | *Jasminum abyssinicum* Hochets. ex DC. | Oleaceae | Abita hareg | L | Indigenous |
| 32 | *Jasminum fluminense* Vell. | Oleaceae | Tbtba hareg | L | Indigenous |
| 33 | *Juniperus procera* Hockst. ex Endl. | Cupressaceae | Yehabesha tsde | T | Indigenous |
| 34 | *Laggera tomentosa (Sch. Bip. exA. Rich.) Oliv. & Hiern,* | Asteraceae | Sheteto | S | Endemic |
| 35 | *Lobelia giberroa* Hemsl. | Lobeliaceae | Jbra | S | Indigenous |
| 36 | *Maesa lanceolata* Forsk | Myrsinaceae | Kuraba | T | Indigenous |
| 37 | *Maytenus addat* (Loes.) Sebsebe | Celastraceae | Kermo ayderk | T | Endemic |
| 38 | *Maytenus arbutifolia* (A. Rich.) Wilczek | Celastraceae | Atat | S | Indigenous |
| 39 | *Maytenus obscura* (A. Rich.) Cuf. | Celastraceae | Kumbel | T | Indigenous |
| 40 | *Maytenus undata* (Thunb.) Blakelock | Celastraceae | Seged | T | Indigenous |
| 41 | *Myrica salicifolia* A. Rich. | Myricaceae | Shinet | T | Indigenous |
| 42 | *Myrsine africana* L. | Myrsinaceae | Kechem | S | Indigenous |
| 43 | *Nuxia congests* R.Br. ex Fresen. | Loganiaceae | Atkor | T | Indigenous |
| 44 | *Ocimum lamiifolium* Hochst. ex Benth. | Lamiaceae | Dama kesse | S | Indigenous |
| 45 | *Olea europae* L.supsp. *cuspidata* (Wall. ex G.Don) Cif. | Oleaceae | Weyra | T | Indigenous |
| 46 | *Olea welwitschii* (Knobl.) Gilg & Schellenb. | Oleaceae | Wegeda | T | Indigenous |
| 47 | *Olinia rochetiana* A. Juss. | Oliniaceae | Tfie | T | Indigenous |
| 48 | *Osyris quadripartita* Decn. | Santalaceae | Keret | S | Indigenous |
| 49 | *Pavetta abyssinica* Fresen. | Rubiaceae | Debenie keleb | S | Indigenous |
| 50 | *Periploca linearifolia* Quart.-Dill. & A. Rich. | Asclepiadaceae | Key mayder | L | Indigenous |
| 51 | *Phytolacca dodecandra* L’Herit. | Phytolaccaceae | Endod | L | *Indigenous* |
| 52 | *Pittosporum abyssinicum* Del. | Pittosporaceae | Ahot | T | Indigenous |
| 53 | *Prunus africana* (Hook. f.) Kalkm. | Rosaceae | Homa | T | Indigenous |
| 54 | *Pterolobium stellatum* (Frossk.) Brenan | Fabaceae | Kentefa | S | Indigenous |
| 55 | *Rhamnus prinoides* L’Herit. | Rhamnaceae | Giesho | S | Indigenous |
| 56 | *Rhamnus staddo* A. Rich. | Rhamnaceae | Tedo | S | Indigenous |
| 57 | *Rhus glutinosa* A. Rich. | Anacardiaceae | Embs | T | Endemic |
| 58 | *Ritchiea albersii* Gilg | Rubiaceae | Tota kolet | T | Indigenous |
| 59 | *Rosa abyssincia* Lindley. | Rosaceae | Kega | T | Indigenous |
| 60 | *Rubus apetalus* Poir. | Rosaceae | Enjorerit | S | Indigenous |
| 61 | *Rumex nervosus* Vahl | Polygonaceae | Embacho | S | Indigenous |
| 62 | *Salix subserrata* Willd. | Salicaceae | Shunshuna | S | Indigenous |
| 63 | *Schefflera abyssinica* (Hochst. ex A. Rich.) Harms | Araliaceae | Getem | T | Indigenous |
| 64 | *Solanecio gigas* (Vatke) C. Jeffrey | Asteraceae | Lb agba | S | Endemic |
| 65 | *Teclea nobilis* Del. | Rutaceae | Sihil | S | Indigenous |
| 66 | *Urera hypselodendron* (A. Rich.) Wedd | Urticaceae | Lankuso | L | Indigenous |
| 67 | *Vernonia amygdalina* Del. | Asteraceae | Grawa | T | Indigenous |
| 68 | *Vernonia hymenolepis* A. Rich. | Asteraceae | Kotkoto | S | Indigenous |
| 69 | *Zehneria scabra* (Linn.f.) Sond. | Cucurbitaceae | Nech hareg | L | Indigenous |

Appendix 2: ANOVA test to check the level of significance for environmental variables

Key: Df (Degree of freedom), Pr (Probability), EC (Electrical conductivity), pH (Potential hydrogen)

| **Variable** | **Df** | **Chisquare** | **F** | **Pr (>F) Sign. codes** |
| --- | --- | --- | --- | --- |
| **Altitude** | **1** | **0.22715** | **3.2399** | **0.001 ***** |
| **Slope** | **1** | **0.10026** | **1.4300** | **0.011 *** |
| **Aspect** | **1** | **0.09846** | **1.4043** | **0.027 *** |
| Browsing | 1 | 0.06788 | 0.9681 | 0.503 ‘ |
| **Cutting** | **1** | **0.10541** | **1.5035** | **0.012 *** |
| Grazing | 1 | 0.08809 | 1.2564 | 0.11 . |
| **pH** | **1** | **0.09902** | **1.4124** | **0.021 *** |
| **EC** | **1** | **0.11325** | **1.6154** | **0.010 **** |
| **Sand** | **1** | **0.10444** | **1.4897** | **0.009 **** |
| Silt | 1 | 0.08985 | 1.2815 | 0.094 . |
| **Organic carbon** | **1** | **0.1165** | **1.6617** | **0.002 **** |
| **Organic matter** | **1** | **0.10087** | **1.4387** | **0.020 *** |
| Total Nitrogen | 1 | 0.08407 | 1.1992 | 0.136 . |
| **Phosphorus** | **1** | **0.1075** | **1.5333** | **0.011 *** |
| **Calcium** | **1** | **0.10162** | **1.4495** | **0.020 *** |
| Sodium | 1 | 0.0948 | 1.3522 | 0.155 . |

Sign. Codes: 0.001 ‘**’ 0.01 ‘*’ 0.05 ‘,’ 0.1 ‘.’

Appendix 3: Grazing activity in the study area

| Plots | Grazing activity | Plots | Grazing activity | Plots | Grazing activity |
| --- | --- | --- | --- | --- | --- |
| 1 | 3 | 18 | 1 | 35 | 0 |
| 2 | 3 | 19 | 0 | 36 | 0 |
| 3 | 2 | 20 | 0 | 37 | 0 |
| 4 | 0 | 21 | 0 | 38 | 0 |
| 5 | 0 | 22 | 0 | 39 | 0 |
| 6 | 0 | 23 | 1 | 40 | 1 |
| 7 | 0 | 24 | 2 | 41 | 0 |
| 8 | 0 | 25 | 1 | 42 | 0 |
| 9 | 0 | 26 | 0 | 43 | 0 |
| 10 | 0 | 27 | 1 | 44 | 0 |
| 11 | 0 | 28 | 0 | 45 | 1 |
| 12 | 0 | 29 | 0 | 46 | 2 |
| 13 | 0 | 30 | 0 | 47 | 0 |
| 14 | 0 | 31 | 2 | 48 | 0 |
| 15 | 0 | 32 | 2 | 49 | 0 |
| 16 | 1 | 33 | 2 | 50 | 0 |
| 17 | 2 | 34 | 0 |  |  |
